# Supplementary material for: Fine mapping and characterization of Fusarium wilt (Fusarium oxysporum f. sp. benincasae) resistance gene Fob1(t) in wax gourd (Benincasa hispida Cogn.)
Source: Front Plant Sci. 2025 May 26;16:1555316. doi: 10.3389/fpls.2025.1555316 (PMC12146367; doi:10.3389/fpls.2025.1555316)
Supplement: Supplementary file 4 [file Table2.xlsx]

## Sheet: Resistance analysis
									Disease Resistance Score (DRS)
									GD68	HM25	F1
									0	4	0		Disease Index （DI)
									0	4	0		GD68	0
									0	4	0		HM25	100
									0	4	1		F1	8.33333
									0	4	0
									0	4	1

## Sheet: F2 DRS
Ridge Number	Disease Resistance Score (DRS)					Total
	0	1	2	3	4
3	2、4、5、30、56、60	6、8、12、16、18、20、21、23、24、28、39、40、45、48、51、52、54、33、55、58、59、68	1、14、15、19、36、42、46、49、50、64、65、66	3、9、11、17、22、35、37、43、44、53、61、67、69、25、26、27、29、31、32、34、38、41、47、57、	7、10、13、62、63、70	70
4	13、18、27、31、39、49、59、67	9、23、24、25、26、28、29、33、34、35、36、40、44、47、52、54、60、62、66、68、69	7、11、12、14、20、32、43、45、56、57、61、65	2、4、15、21、37、46、48、50、51、55、63、64、16、17、19、30、38、41、42、8、9、13、14、16、17、18、25、29、30	1、3、6、8、53、58、70、32、33、34、36、37、38、39、44、50、5、10、22	70
5	60	3、4、10、24、28、62、67	26、45、59、61、64、65、69	23、35、43、53、63、68、6、7、19、21、22、55、	1、5、57、58、70、71、72、2、11、12、15、20、27、31、40、41、42、46、47、48、49、51、52、54、56、66	72
6	3、8、12、42、45、50、59	9、10、18、28、30、31、48、51、56、60、61、67、70	4、5、7、17、25、29、40、43、47、49、54、55、62、63、66、71	2、13、14、15、16、37、53、69、19、20、21、22、23、24、27、32、33、34、35、36、11、38、41、44、46、	1、6、52、57、58、26、39、64、65、68	71
7	18、24、34	3、4、11、16、17、23、25、28、29、30、36、38、42、44、71、49、69	5、19、35、39、50、55、56、57、58、61、62、63、64、65、68、70	7、14、20、26、32、41、43、45、13、15、21、22、27、31、33、37、40、46、47、48、51、52、	1、6、8、9、10、12、53、54、59、60、66、67、8、9、21、60、59	71
8	2、67	15、27、26、32、36、42、45、46、49、54、55、69、71、72	3、6、8、39、47、68、58	4、12、14、18、34、41、51、57、60、62、70、21、22、23、24、25、28、29、30、31、33、35、37	1、5、7、9、13、19、20、48、50、64、65、66、38、40、43、44、53、56、59、61、63、10、11、16、17、52	72
9	37、39、40、41、43、44	15、17、18、20、27、45、48、50、54、58、61	9、12、14、16、24、26、31、60、62、64	13、32、38、49、1、2、3、4、5、6、7、8、10、11、19、22、23、28、29、30、33、34、36、42、46、	47、52、53、55、57、59、65、67、68、21、35、51、56、63、66、69、70	69
10	10、13、35、37、39、71	1、2、4、6、7、8、9、11、12、14、15、19、26、27、28、30、31、32、36、40、43、44、46、49、54、56、58、60、63、66、70	3、20、22、23、33、34、38、53、55、57、64、65、69	25、45、61、62、2、4、5、6、9、11、12、13、14、15、20、24、27、29、31、32、34、36、37、38、40、42、	16、17、18、21、41、48、50、51、52、59、67、68、5、24、29、42、47	71
11	22、48、57	7、8、16、17、25、51、52、58、59、60、64、	3、10、18、21、33、41、44、46、47、50	1、23、26、39、53、54、55、56、61、62、63、66、67、68、69、	43、49、70、19、28、35、45	68
12	51	8、29、30、41、42、44、52、60、66、67、68、69、70	2、10、36、49、53、54、56、58	3、7、28、6、11、12、14、15、16、19、20、22、27、31、32、33、34、35、37、38、39、40、	1、4、43、46、47、48、57、59、61、63、64、5、13、17、18、21、23、24、25、26、45、50、55、65、62	69
13	6、13、31、41、48	1、4、5、12、14、15、20、21、22、23、25、26、27、28、33、37、38、39、42、47、58、62、63、64	10、11、59、66	2、9、32、36、45、51、52、56、61、69、40、46、49、53、54、55、57、60、65、67、68、70	3、7、8、16、17、18、19、24、29、30、35、34、44、50	69
14	2、8、13、20、29	7、16、28、33、43、44、51、58	1、4、10、11、12、15、18、39、49、54、59、64	5、68、69、17、21、22、23、24、25、26、27、30、31、32、34、36、37、38、40、41、42、45	3、9、14、46、48、50、52、53、56、57、61、62、66、70、6、47、55、60、63、65、67	68
15	22、34、53	17、18、31、32、35、37、38、44、47、62、69	11、13、36、60	3、6、27、33、45、64、10、12、19、20、23、24、25、26、28、29、41、42、43、46、48、49、50、51、	1、2、4、5、7、8、9、52、54、55、56、65、66、67、68、70、14、15、16、21、30、39、40、57、58、59、61、63	70
16	20、66、69	12、13、25、26、49、61、63、64、57、59	3、8、16、34、42、44、58、67、70	11、18、21、28、68、5、6、7、10、14、17、19、22、23、24、27、29、30、31	1、2、4、15、50、51、53、55、60、62、65、32、33、36、37、39、41、43、45、46、47、48、9、35、38、40、52、54、56	70
17	3、14、54、56	1、6、7、8、9、10、11、12、16、20、22、23、28、33、35、38、45、48、62、64、65、66、68、69、71、77	24、25、41、42、46、47、51、58、60、61、63、72、76	2、4、13、18、52、59、21、26、27、29、31、32、34、36、37、39、40、43、	15、17、19、44、49、50、53、55、57、67、70、73、74、75、5、30	77
18	7、52、58、63、65、68	1、5、8、14、15、19、26、34、35、42、48、51、53、60、61、62、71、70	9、10、12、43、47、49、50、67	22、29、33、45、4、6、11、13、16、17、18、20、23、24、25、28、30、31、32、36、	2、3、37、38、39、40、41、44、59、46、54、56、57、64、66、69、21、27、55	71
19	31、40、52、62、66、68	2、12、24、26、32、33、38、50、51、53、56、70	1、3、4、5、13、27、36、43、47、63、67、69	7、15、16、45、48、9、10、11、14、17、18、19、20、22、23、25、28、29	6、8、49、54、55、57、58、59、60、65、61、30、34、37、39、41、42、44、46、21、35、64	70
20	14	1、3、12、16、17、18、24、32、46、51、65、69、71、11、15、31、33、	2、7、8、10、13、23、59、63、68	37、70、19、20、21、22、25、26、27、28、29、30、44、45、47、48、52、53、54、55、56、57、58、60、61、6、9、	4、5、34、35、36、38、39、40、41、42、43、62、64、66、67、49、50	71
21	14、19、31	6、10、11、12、13、17、25、26	8、9、35	1、15、7、16、18、20、22、27、28、29、	2、3、433、34、5、21、23、24、30、32	35
						1034

## Sheet: BSA pool
	Number	Resistance DNA pool	Susceptible DNA pool
	1	3-5	4-22
	2	3-56	5-40
	3	4-13	5-41
	4	4-18	5-48
	5	4-31	5-49
	6	4-49	5-52
	7	6-42	6-26
	8	7-18	7-21
	9	7-24	7-60
	10	8-67	8-11
	11	9-37	8-16
	12	9-40	9-21
	13	9-41	9-56
	14	10-10	9-63
	15	10-35	10-47
	16	10-36	11-28
	17	10-37	12-18
	18	10-39	12-65
	19	13-13	13-34
	20	13-41	14-63
	21	14-2	14-65
	22	16-20	16-35
	23	16-66	18-21
	24	17-23	18-27
	25	17-14	18-55
	26	18-58	19-35
	27	19-40	19-64
	28	19-52	20-49
	29	21-14	20-50
	30	21-31	21-32
	Note: The preceding number represents the Ridge number, while the following number represents the specific individual plant. For example, '3-5' represents the fifth plant in the third ridge.

## Sheet: QTL-Chr01
										1M90.10								1M96.13								1M97.03
Number	Marker
	1M90.10	1M96.13	1M97.03	1M99.00	1M100.03	1M101.13
3-5	H	A	A	A	A	A
3-56	H	H	H	H	H	H
4-13	B	B	B	B	B	B
4-18	H	A	A	A	A	A
4-31	A	A	A	A	A	A
4-49	H	H	H	H	H	H
6-42	B	B	B	B	B	B
7-18	H	A	A	A	A	A
7-24	A	H	H	H	H	H
8-67	H	H	H	H	H	H
9-37	H	H	H	H	H	H
9-40	H	H	H	H	H	H
9-41	H	B	B	B	B	B
10-10	H	H	H	H	H	H
10-35	H	H	H	H	H	H
10-36	B	B	B	B	B	B
10-37	B	H	H	H	H	H
10-39	B	B	B	B	B	B
13-13	H	H	H	H	H	H
13-41	A	A	A	A	A	A
14-2	H	H	H	H	H	H
14-8	H	H	H	H	H	H
15-22	A	A	A	A	A	A				1M99.00								1M100.03								1M101.13
15-34	H	B	B	B	B	B
15-53	H	A	A	A	A	A
16-69	H	H	H	H	H	H
16-20	H	H	H	H	H	H
16-66	H	A	A	A	A	A
17-3	H	H	H	H	H	H
17-14	A	A	A	A	A	A
17-54	H	H	H	A	A	A
17-56	A	A	A	A	A	A
18-7	H	H	H	A	A	A
18-52	A	A	A	A	A	A
18-58	H	H	H	A	H	H
18-63	A	A	A	A	A	A
18-65	H	A	H	A	A	A
18-68	H	H	H	A	A	A
19-31	A	A	A	A	A	A
19-40	A	H	H	H	H	H
19-52	A	H	H	H	H	H
19-62	A	A	A	A	A	A
19-66	B	B	B	B	B	B
19-68	A	A	A	A	A	A
20-14	B	H	H	H	H	H
21-14	B	H	H	H	H	H
21-19	B	B	B	B	B	B
21-31	A	A	A	A	A	A
4-22	A	A	A	A	A	A
5-40	H	H	H	H	H	H
5-41	B	H	H	H	H	H
5-48	H	H	H	H	H	H
5-49	H	H	H	H	H	H
5-52	H	A	A	A	A	A
6-26	B	B	B	B	B	B
7-21	H	H	H	H	H	H
7-60	H	B	B	B	B	B
8-11	B	B	B	B	B	B
8-16	A	H	H	H	H	H
9-21	H	A	H	A	A	A
9-56	B	B	B	B	B	B
9-63	A	A	A	A	A	A
10-47	H	H	H	H	H	H
11-28		H	H	H	H	H
12-18	A	A	A	A	A	A
12-65	H	A	A	A	A	A
13-34	B	B	B	H	H	H
14-63	H	H	H	H	H	H
14-65	A	A	A	A	A	A
15-14	H	H	H	H	H	H
15-21	H	H	H	B	B	B
15-30	H	H	H	H	H	H
15-39	H	H	H	H	H	H
16-9	H	A	A	A	A	A
16-35	H	A	A	A	A	A
16-38	H	H	A	A	A	A
16-40	H	H	H	H	H	B
16-52	H	H	H	H	H	B
16-54	A	A	A	A	A	A
16-56	H	H	H	H	H	H
17-5	B	B	B	B	B	B
17-30	H	H	H	H	A	A
18-55	B	B	B	B	H	H
18-21	B	H	H	H	H	H
18-27	A	A	A	A	A	A
18-55	H	H	H	H	H	H
19-21	H	H	H	H	H	H
19-35	H	H	H	H	H	H
19-64	H	H	A	A	A	A
20-49	B	B	B	B	B	B
20-50	H	H	H	H	H	H
21-21	B	B	B	B	B	B
21-23	B	B	B	B	B	B
21-24	B	B	B	B	B	B
21-30	H	A	A	H	H	H
21-32	H	H	H	B	B	B

## Sheet: QTL-Chr08
Number	Marker							8M49.16							8M55.38
	8M49.16	8M55.38	8M58.40	8M63.40
3-5	B	B	B	B
3-56	A	A	A	H
4-13	H	H	H	H
4-18	H	B	B	A
4-31	H	H	B	B
4-49	B	B	B	H
6-42	H	H	H	H
7-18	A	B	B	A
7-24	H	H	H	H
8-67	H	B	B	H
9-37	B	B	B	B
9-40	H	H	H	H
9-41	H	H	H	H
10-10	H	B	B	B
10-35	A	A	H	H
10-36	A	A	A	A
10-37	H	B	B	A
10-39	H	H	H	H
13-13	H	H	H	H
13-41	H	B	B	H
14-2	A	A	A	A
14-8	A	H	B	H				8M58.40							8M63.40
15-22	B	B	B	B
15-34	H	B	B	H
15-53	A	A	A	A
16-69	B	B	B	H
16-20	A	B	B	B
16-66	A	A	A	A
17-3	B	B	B	B
17-14	A	A	B	A
17-54	A	B	B	H
17-56	H	H	B	H
18-7	H	B	B	H
18-52	B	B	B	B
18-58	B	B	B	H
18-63	H	H	H	H
18-65	A	B	B	A
18-68	H	H	B	H
19-31	A	B	B	A
19-40	H	H	B	H
19-52	A	A	A	A
19-62	B	B	B	H
19-66	B	B	B	B
19-68	H	H	H	H
20-14	H	H	H	H
21-14	H	B	B	H
21-19	A	B	B	H
21-31	H	H	H	H
4-22	H	B	B	H
5-40	H	H	H	H
5-41	H	H	H
5-48	A	B	B	B
5-49	H	H	H	H
5-52	B	B	B	B
6-26	A	B	B	A
7-21	A	A	A	A
7-60	H	B	B	B
8-11	B	B	B	B
8-16	H	B	B	H
9-21	B	B	B	B
9-56	H	B	B	A
9-63	B	B	B	B
10-47	A	B	B	H
11-28	H	H	H	H
12-18	A	A	B	A
12-65	A	B	B	A
13-34	B	B	B	B
14-63	A	B	B	A
14-65	H	H	B	H
15-14	H	H	H	H
15-21	B	B	B	H
15-30	H	B	B	H
15-39	H	H	B	H
16-9	B	B	B	B
16-35	H	B	B	B
16-38	H	H	B	B
16-40	H	B	B	B
16-52	H	B	B	H
16-54	B	B	B	A
16-56	H	H	B	H
17-5	H	B	B	H
17-30	A	B	B	H
18-55	H	H	H	H
18-21	B	B	B	B
18-27		B	B	H
18-55	B	B	B	H
19-21	A	B	B	A
19-35	B	B	B	B
19-64	A	A	A	A
20-49	H	B	B	H
20-50	A	A	A	H
21-21		B	B	H
21-23	B	B	B	H
21-24	H	H	H	B
21-30	H	H	H	H
21-32	B	B	B	B

## Sheet: QTL-Chr03
Number	Marker													L1				L2					L3
	L1	L2	L3	3M13.385	3M14.244	3M13.893	3M16.516	3M16.869	L4	L5	L6
3-5	A	H	B	B	B	B	B	B	B	B	B
3-56	A	A	A	H	H	H	H	H	H	H	H
4-13	B	B	B	B	B	B	B	B	B	B	B
4-18	H	H	H	H	H	H	H	H	H	H	H
4-31	B	B	B	B	B	B	B	B	B	H	H
4-49	H	H	H	H	H	H	H	H	H	H	H
6-42	H	B	B	B	B	B	B	B	B	B	B
7-18	B	B	H	H	H	H	H	A	A	A	A
7-24	B	B	B	B	B	B	B	B	B	B	B
8-67	B	H	H	H	H	H	H	H	H	H	H
9-37	H	A	A	A	A	A	A	A	A	H	H
9-40	A	H	H	H	H	H	H	H	H	H	H
9-41	H	H	H	A	A	A	A	A	A	A	H
10-10	H	H	H	H	H	H	H	H	H	H	H
10-35	H	H	H	H	H	H	H	H	H	H	H
10-36	A	H	H	H	H	H	H	H	H	H	H
10-37	A	H	H	H	H	H	B	B	B	B	B			L4				L5					L6
10-39	B	H	H	H	H	H	H	H	H	B	H
13-13	H	H	H	H	H	H	H	H	H	H	H
13-41	H	H	H	H	H	H	H	H	H	A	A
14-2	H	H	H	H	H	H	H	H	H	H	H
14-8	B	B	B	B	B	B	B	B	H	A	A
15-22	H	H	H	H	H	H	H	H	H	H	H
15-34	B	B	B	B	B	B	B	B	B	H	H
15-53	H	H	H	H	H	H	A	A	A	A	B
16-69	H	H	H	H	H	H	H		H	H	H
16-20	H	B	B	B	B	B	B	B	B	H	B
16-66	B	B	B	B	B	B	B	B	B	H	H
17-3	H	H	H	H	H	H	H	H	H	H	H
17-14	H	H	H	H	H	H	H	H	H	H	H
17-54	H	H	H	H	H	H	B	B	B	B	B
17-56	H	H	H	B	B	B	B	B	B	B	B
18-7	B	B	B	B	B	B	B	B	B	B	B
18-52	H	H	H	B	B	B	B	B	B	B	B
18-58	B	B	B	B	B	B	B	B	B	B	B
18-63	H	H	H	B	B	B	B	B	B	B	B
18-65	H	H	H	H	H	B	B	B	B	B	H
18-68	H	A	A	A	A	A	A	A	H	H	B			3M13.385				3M16.869
19-31	A	B	B	B	B	B	B	B	B	B	B
19-40	H	B	B	B	B	B	B	B	B	H	B
19-52	B	B	B	B	B	B	B	B	B	H	A
19-62	H	H	H	H	H	H	H	H	H	A	A
19-66	B	B	B	B	B	B	B	B	B	B	B
19-68	H	B	B	B	H	H	H	H	H	H	A
20-14	A	A	A	A	H	H	H	H	H	H	H
21-14	H	B	B	B	B	B	B	B	H	H	H
21-19	H	H	H	H	H	H	H	H	H	A	A
21-31	H	H	H	H	H	H	H	H	H	H	H
4-22	B	A	A	A	A	A	A	A	A	H	H
5-40	B	H	H	B		B	B	B	B	B	B
5-41	B	B	H	H	H	H	H	H	H	H	B
5-48	A	A	A	A	A	A	A	A	A	A	A
5-49	A	A	A	A	A	A	A	A	A	A	A
5-52	A	A	A	A	A	A	A	A	A	A	A
6-26	H	B	B	B	B	B	B	H	H	H	H
7-21	A	A	A	A	A	A	A	A	A	B	A
7-60	H	A	A	A	A	A	A	A	A	A	B
8-11	H	A	A	A	B	A	A	A	A	H	H
8-16	A	H	H	H	H	B	B	B	B	B	B			14.244
9-21	H	H	H	B	B	B	B	B	B	B	B							14.893					16.516
9-56	H	H	H	H	H	H	H	H	H	H	H
9-63	B	A	A	A	A	A	A	A	A	A	A
10-47	A	A	A	A	A	A	H	H	B	B	H
11-28	H	H	H	A	A	A	A	A	A	H	A
12-18	H	A	A	A	A	A	A	A	H	B	H
12-65	H	B	B	B	B	B	B	B	B	B	B
13-34	H	H	H	A	A	A		A	A	H	H
14-63	H	H	H	H	H	H	H	H	H	H	H
14-65	H	H	H	A	A	A	A	A	A	H	H
15-14	B	B	H	B	H	H	H	H	H	H	H
15-21	A	A	A	A	A	A	A	A	A	H	H
15-30	B	H	H	H	A	A	A	A	A	A	A
15-39	B	B	B	B	B	B	B	B	B	B	B
16-9	A	H	H	H	H	H	H	H	H	H	H
16-35	H	H	H	H	H	H	H	H	H	H	H
16-38	H	A	H	A	A	A	H	H	H	B	B
16-40	A	A	A	A	A	A	H	H	H	H	H
16-52	A	A	A	A	A	A	A	A	A	A	B
16-54	H	B	B	H	B	B	B	B	B	B	B
16-56	H	H	H	H	B	B	B	B	B	B	B
17-5	B	H	H	A	A	A	A	A	A	A	A
17-30	H	H	H	A	H	H	H	H	H	A	A
18-55	B	H	H	A	A	A	A	A	A	A	A
18-21	B	A	A	H	A	A	A	A	A	H	H
18-27	A	A	A	A	A	A	A	A	H	B	B
18-55	B	H	H	A	H	H	H	H	A	A	H
19-21	B	B	B	H	H	H	H	A	A	A	A
19-35	H	H	H	H	A	A	A	A	A	A	A
19-64	B	H	H	H	H	H		H	H	H	A
20-49	A	H	H	A	H	H		H	H	A	H
20-50	A	A	A	A	A	A	H	H	H	H	H
21-21	A	A	A	H	H	H	H	H	H	H	H
21-23	B	B	B	H	H	H	H	H	H	A	B
21-24	B	B	B	H	B	H	H	H	H	H	B
21-30	H	H	H	H	H	H	H	H	H	H	H
21-32	B	B	B	B	A	A	A	A	A	A	A
	Number	Marker
		L2	L3	H13.385	H14.244	H14.893	H16.516	H16.869	L4
	3-5	H	B	B	B	B	B	B	B
	4-13	A	A	H	H	H	H	H	H
	4-18	B	B	B	B	B	B	B	B
	4-31	H	H	H	H	H	H	H	H
	4-49	B	B	B	B	B	B	B	B
	6-42	H	H	H	H	H	H	H	H
	7-24	B	B	B	B	B	B	B	B
	8-67	B	H	H	H	H	H	A	A
	9-40	B	B	B	B	B	B	B	B
	10-10	H	H	H	H	H	H	H	H
	10-35	H	H	H	H	H	H	H	H
	10-39	H	H	H	H	H	H	H	H
	13-13	H	H	H	H	H	H	H	H
	13-41	H	H	H	H	H	H	H	H
	14-2	H	H	H	H	H	B	B	B
	14-8	H	H	H	H	H	H	H	H
	15-22	H	H	H	H	H	H	H	H
	15-34	H	H	H	H	H	H	H	H
	16-69	H	H	H	H	H	H	H	H
	16-20	B	B	B	B	B	B	B	H
	16-66	H	H	H	H	H	H	H	H
	17-3	B	B	B	B	B	B	B	B
	17-14	H	H	H	H	H	A	A	A
	17-54	H	H	H	H	H	H		H
	17-56	B	B	B	B	B	B	B	B
	18-7	B	B	B	B	B	B	B	B
	18-52	H	H	H	H	H	H	H	H
	18-58	H	H	H	H	H	H	H	H
	18-63	H	H	H	H	H	B	B	B
	18-65	H	H	B	B	B	B	B	B
	19-40	B	B	B	B	B	B	B	B
	19-52	H	H	B	B	B	B	B	B
	19-62	B	B	B	B	B	B	B	B
	19-66	H	H	B	B	B	B	B	B
	19-68	H	H	H	H	B	B	B	B
	20-14	B	B	B	B	B	B	B	B
	21-14	B	B	B	B	B	B	B	B
	21-19	B	B	B	B	B	B	B	B
	5-41	H	H	H	H	H	H	H	H
	5-48	B	B	B	B	B	B	B	B
	5-49	B	B	B	H	H	H	H	H
	5-52	A	A	A	H	H	H	H	H
	7-60	B	B	B	B	B	B	B	H
	9-56	H	H	H	H	H	H	H	H
	9-63	H	H	H	H	H	H	H	H
	10-47	A	A	A	A	A	A	A	A
	11-28	A	A	A	A	A	A	A	A
	12-18	A	A	A	A	A	A	A	A
	13-34	A	A	A	A	A	A	A	A
	14-63	A	A	A	A	A	A	A	A
	14-65	A	A	A	A	A	A	A	A
	15-14	A	A	A	A	A	A	A	A
	15-21	A	A	A	A	A	H	H	B
	15-30	H	H	A	A	A	A	A	A
	16-9	A	A	A	A	A	A	A	H
	16-35	H	H	A	A	A		A	A
	16-38	H	H	A	A	A	A	A	A
	16-40	A	A	A	A	A	A	A	A
	16-52	H	H	H	A	A	A	A	A
	17-5	A	A	A	A	A	H	H	H
	17-30	A	A	A	A	A	H	H	H
	18-55	A	A	A	A	A	A	A	A
	18-21	H	H	A	A	A	A	A	A
	18-27	H	H	A	A	A	A	A	A
	18-55	A	A	A	A	A	A	A	A
	19-21	A	A	A	A	A	A	A	H
	19-35	H	H	H	H	H	H	H	A
	19-64	B	B	H	H	H	H	A	A
	20-49	H	H	H	A	A	A	A	A
	20-50	H	H	H	H	H		H	H
	21-21	H	H	H	H	H		H	H
	21-23	A	A	A	A	A	H	H	H
	21-30	A	A	H	H	H	H	H	H
	21-32	B	B	B	A	A	A	A	A

## Sheet: Fina mapping
							Number		Disease Resistance Score (DRS)									Disease Index （DI)
								1	2	3	4	5	6	7	8	9	10	DI	DI( %)
							19-24	1	1	2	2	2	2	2	2	3	3	0.5	50% (MR)
							13-13	1	1	1	2	2	2	2	2	2	3	0.45	45% (MR)
							5-61	1	2	2	2	2	2	2	2	2	2	0.475	47.5% (MR)
							18-25	0	1	1	1	2	2	2	2	3	3	0.425	42.5% (MR)
							19-39	0	1	1	2	2	2	2	2	3	4	0.475	47.5% (MR)
							4-20	0	0	0	0	0	0	0	1	1	1	0.075	7.5% (HR)
							20-39	0	0	0	0	0	0	0	0	0	1	0.025	2.5% (HR)
							20-54	1	1	1	1	1	1	2	2	3	3	0.4	40% (MR)
							4-54	1	1	1	2	2	2	2	3	3	3	0.5	50% (MR)
							6-55	1	1	1	1	1	1	1	2	2	2	0.325	32.5% (MR)
							HM25	4	4	4	4	4	4	4	4	4	4	1	100% (HS)
							GD68	0	0	0	0	0	0	0	0	0	1	0.025	2.5% (HR)

## Sheet: Candidate gene table
	Gene Id	Annotation
	Bch03G006360	chitinase 1 [Cucumis sativus]
	Bch03G006370	endochitinase-like [Cucurbita moschata]
	Bch03G006380	endochitinase [Cucumis sativus]
	Bch03G006390	pentatricopeptide repeat-containing protein At2g17670 [Cucumis sativus]
	Bch03G006400	uncharacterized protein LOC101217557 [Cucumis sativus]
	Bch03G006410	PREDICTED: uncharacterized protein LOC103485177 [Cucumis melo]
	Bch03G006420	PREDICTED: uncharacterized protein LOC103485178 [Cucumis melo]
	Bch03G006430	IST1-like protein isoform X2 [Cucumis sativus]
	Bch03G006440	protein S-acyltransferase 10 isoform X1 [Cucumis sativus]
	Bch03G006450	mediator of RNA polymerase II transcription subunit 12-like isoform X1 [Cucumis melo var. makuwa]
	Bch03G006460	putative F-box protein At1g65770 [Cucumis sativus]
	Bch03G006470	PREDICTED: putative F-box protein At1g65770 [Cucumis melo]
	Bch03G006480	F-box protein SKIP23-like isoform X1 [Cucumis sativus]
	Bch03G006490	PREDICTED: UPF0548 protein At2g17695 [Cucumis melo]
	Bch03G006500	PREDICTED: thiol-disulfide oxidoreductase LTO1 [Cucumis melo]
	Bch03G006510	uncharacterized protein LOC101216776 isoform X1 [Cucumis sativus]
	Bch03G006520	ammonium transporter 3 member 3 [Cucumis sativus]
	Bch03G006530	ankyrin repeat domain-containing protein, chloroplastic [Cucurbita moschata]
	Bch03G006540	PREDICTED: serine/arginine-rich splicing factor SR45a [Cucumis melo]
	Bch03G006550	phospholipase D delta [Cucumis melo var. makuwa]
	Bch03G006560	PREDICTED: probable prolyl 4-hydroxylase 10 [Cucumis melo]
	Bch03G006570	PREDICTED: aconitate hydratase [Cucumis melo]

## Sheet: transcriptome
seq_id	F_0_1	F_0_2	F_0_3	F_4_1	F_4_2	F_4_3	F_6_1	F_6_2	F_6_3	F_8_1	F_8_2	F_8_3	F_10_1	F_10_2	F_10_3	L_0_1	L_0_2	L_0_3	L_4_1	L_4_2	L_4_3	L_6_1	L_6_2	L_6_3	L_8_1	L_8_2	L_8_3	L_10_1	L_10_2	L_10_3
Bch03G006380	4.12	2.57	2.45	15.16	6.53	4.15	0.6	30.46	0.86	5.24	12.99	19.71	34.66	30.47	30.81	6.11	34.77	10.4	44.99	49.04	69.98	17.24	39.49	37.35	2319.08	71.05	279.43	6890.56	19306.8	26830.9
Bch03G006410	3.08	1.37	2.67	15.6	13.94	25.4	11.28	25.32	8.95	11.31	8.49	8.59	11.93	6.88	3.86	3.13	2.53	1.29	11.87	21.05	15.39	10.9	13.41	6.7	6.88	3.99	4.86	4.28	1.3	0.12
Bch03G006470	9.1	5.55	9.57	6.47	5.35	5.92	5.27	6.46	5.05	10.41	7.22	14.09	20.52	12.32	16.84	11.04	7.7	9.46	5.36	4.21	8.24	3.78	7.36	9.65	11.41	12.62	15.37	15.2	21.33	11.23
Bch03G006550	17.37	16.18	19.06	22.56	22.72	23.85	12.49	10.12	9.48	25.68	18.2	29.94	20.02	26.55	28.83	14.33	19.61	34.3	9.9	11.13	20.55	5.37	17.06	18.22	11.85	24.75	25.33	27.12	6.08	7.43
	Note: F is GD68, L is HM25

## Sheet: qPCR
Sample	actin	Bch03G006380		Bch03G006410		Bch03G006470		Bch03G006550
	Ct	Ct	2^-ΔΔCt	Ct	2^-ΔΔCt	Ct	2^-ΔΔCt	Ct	2^-ΔΔCt
F_0_1	24.8329	32.0925	6.68266	27.8298	128.278	26.3585	355.658	30.0699	27.1518
F_0_1	24.9464	31.6868	9.57708	27.4389	181.957	26.3894	376.627	29.8735	33.6577
F_0_1	24.934	31.6164	9.96986	27.8244	138.093	26.4328	362.32	29.8976	32.8174
F_0_2	25.1776	32.9402	4.71559	28.9694	73.9357	28.3956	110.054	30.5839	24.1461
F_0_2	25.1043	33.1771	3.80306	28.9449	71.4766	28.3824	105.555	30.5485	23.5192
F_0_2	25.1597	33.1251	4.09702	28.7959	82.3589	28.4589	104.027	30.718	21.7311
F_0_3	26.9178	34.5587	5.13036	29.4041	182.747	27.89	521.957	31.044	58.6399
F_0_3	26.8557	32.6503	18.4481	29.3397	183.039	28.1226	425.522	31.4064	43.6912
F_0_3	26.3568	33.3816	7.86397	29.4947	116.336	28.0146	324.526	31.2948	33.4066
F_6_1	23.9275	31.9665	3.89335	27.1548	109.348	25.0303	148.952	25.9225	256.901
F_6_1	23.831	32.4359	2.63005	27.3169	91.3976	24.9581	152.684	25.8245	257.154
F_6_1	23.9032	32.2216	3.20788	27.2825	98.4068	25.1021	153.853	25.9277	251.687
F_6_2	21.757	25.5011	76.4186	24.9863	109.188	24.9432	113.656	24.8833	117.264
F_6_2	21.6709	25.5347	70.3333	24.9756	103.625	24.7758	122.878	24.7693	119.558
F_6_2	21.7177	25.6458	67.2666	24.9997	105.272	24.9776	113.255	24.8897	113.61
F_6_3	25.3536	34.6674	1.60899	28.9391	85.3017	25.3499	84.7329	28.6154	106.755
F_6_3	25.1607	32.9732	4.55543	28.9386	74.653	25.0363	104.31	29.1103	66.2792
F_6_3	25.1713	33.9699	2.29966	28.6394	92.5312	25.0744	106.427	28.8684	78.9526
F_10_1	23.0801	27.7534	40.1322	26.5521	92.2836	24.6474	345.534	26.9261	22.8538
F_10_1	23.0784	27.6876	41.9539	26.3996	102.452	24.6278	349.836	26.5919	24.4739
F_10_1	23.2055	27.8773	40.1744	26.4593	107.356	24.5606	400.299	26.5004	25.469
F_10_2	23.7724	27.9775	55.5181	27.9228	57.6627	25.9554	225.502	27.8232	37.2392
F_10_2	23.7911	28.13	50.6002	28.0425	53.7641	25.9678	226.486	27.8641	33.1829
F_10_2	23.7442	28.1885	47.0355	28.1533	48.1993	25.9621	220.111	27.875	33.1551
F_10_3	22.9603	27.6674	39.2015	27.0707	59.2857	25.5255	173.012	29.4251	14.9528
F_10_3	22.9558	27.8277	34.9727	27.0881	58.3932	25.6168	161.909	28.9462	18.5526
F_10_3	22.9845	28.0376	30.8435	27.1596	56.6848	25.4458	185.939	29.0255	17.407
L_0_1	22.249	29.9119	5.05286	25.3938	115.783	25.1018	453.75	26.2106	65.7292
L_0_1	22.2125	29.7954	5.34082	25.292	121.133	25.0798	430.903	26.0934	69.5045
L_0_1	22.3675	29.752	6.12844	25.4512	120.787	25.2268	409.128	26.3338	65.5098
L_0_2	21.7718	28.2589	11.4153	24.3166	175.476	23.4611	314.26	25.6	72.0916
L_0_2	21.7169	28.2338	11.1814	24.3608	163.825	23.3574	318.127	25.6113	68.8558
L_0_2	21.8011	28.485	9.95942	24.5397	153.424	23.4211	314.414	25.4128	83.7678
L_0_3	21.7547	28.496	9.57121	25.2778	89.0734	26.947	339.351	25.8496	59.9263
L_0_3	21.741	28.6206	8.69607	25.3521	83.8025	27.1684	254.644	25.828	60.2552
L_0_3	21.8081	28.8222	7.92242	25.3997	84.9444	27.4449	211.771	25.8648	61.5359
L_6_1	23.6721	28.2224	43.7021	27.8612	56.1355	26.2287	174.047	26.5574	165.436
L_6_1	23.7015	28.2968	42.3622	27.6915	64.4434	26.1487	187.765	26.5919	151.07
L_6_1	23.6974	28.5	36.6924	27.675	65.0017	26.3624	161.464	26.6614	151.364
L_6_2	24.6677	28.0609	97.4591	28.2003	88.4873	27.1746	180.149	23.9	231.835
L_6_2	24.6227	28.0196	97.211	28.2713	81.6481	27.4891	140.412	23.8323	228.902
L_6_2	24.713	28.3138	84.4024	28.5817	70.1015	27.2932	171.236	23.9499	217.935
L_6_3	23.8302	27.4783	81.6796	27.746	67.8496	26.09	213.811	27.935	171.085
L_6_3	23.7722	27.376	84.2255	27.701	67.2382	26.027	214.553	28.1142	132.198
L_6_3	23.8164	27.5093	79.1791	27.8331	63.2628	26.2319	191.944	28.1851	126.781
L_10_1	21.4404	18.9099	5916.62	25.5252	60.3465	23.7907	200.818	26.9315	22.7674
L_10_1	21.2051	18.8689	5170.86	24.9559	76.0667	23.574	198.236	26.964	18.9093
L_10_1	21.171	18.8143	5244.95	24.9144	76.4619	23.6979	177.679	27.1394	16.355
L_10_2	23.042	17.774	39456.6	26.5952	87.2307	24.6407	338.089	28.7513	19.5716
L_10_2	22.9164	17.6495	39427.1	26.5782	80.9099	24.6554	306.772	28.4128	22.6848
L_10_2	22.9261	17.5274	43199.5	26.4614	88.3237	24.6504	309.901	29.194	13.2886
L_10_3	23.3274	18.0351	40126.5	27.4588	58.4295	24.8557	355.01	29.5429	13.7798
L_10_3	23.1598	17.9655	37492.1	27.3454	56.2724	24.7571	338.413	29.3995	13.5508
L_10_3	23.1471	17.8979	38947.4	27.2709	58.739	24.8877	306.427	29.125	16.2468
	Note: F is GD68, L is HM25

[truncated: 1 more sheets: phylogenetic tree]
