# Supplementary material for: Fine mapping and characterization of Fusarium wilt (Fusarium oxysporum f. sp. benincasae) resistance gene Fob1(t) in wax gourd (Benincasa hispida Cogn.)
Source: Front Plant Sci. 2025 May 26;16:1555316. doi: 10.3389/fpls.2025.1555316 (PMC12146367; doi:10.3389/fpls.2025.1555316)
Supplement: Supplementary file 7 [file DataSheet3.xlsx]

## Sheet: Figure S1. Marker 3M9.425
Markers 3M9.425 detection in 2.5% agarose gel.
Figure S1. Markers 3M9.425 detection in 2.5% agarose gel. Lanes 1, M, 2000 bp marker; Lanes 2–3, GD68 and HM25; Lanes 4–7, four negative wax gourd materials without the Fob1(t) gene; Lanes 8–16, partial HM25/GD68 F2 selected individual plants;17-18，GD68 and HM25. Note：This image corresponds to Figure 7A in the article.

## Sheet: Figure S2. Marker 3M16.869
Markers 3M16.869 detection in 2.5% agarose gel.
Figure S2. Markers 3M16.869 detection in 2.5% agarose gel. Lanes 1, M, 2000 bp marker; Lanes 2–3, GD68 and HM25; Lanes 4–7, four negative wax gourd materials without the Fob1(t) gene; Lanes 8–16, partial HM25/GD68 F2 selected individual plants;17-18，GD68 and HM25. Note：This image corresponds to Figure 7B in the article.

## Sheet: Table S1. Primer list
S1 Table. The primers used in this study
Primer name	Sequence (5′–3′)
For Fob1 gene mapping
1M90.106F	CGGCTGATAAGTGAATTAGTAG
1M90.106R	TGGACACGAGATGAAAACATTC
1M96.132F	ATCTAATGGACAGTGGAGTTGG
1M96.132R	CCCTGTGACCTAGAAAGTGAAT
1M97.035F	GATTGCAATGATGGGGGGTCAA
1M97.035R	AAGATTCCGACCATAAAGCCAT
1M99.002F	TGCTCTTCTACTTCCACTTGTT
1M99.002R	ACCATAAGGAAGGTTTTCAACG
1M100.388F	AGACTTCACGGGCGAGTGAAAT
1M100.388R	CCCGCAGTAATATCCATTCTAA
1M101.164F	ATTGGTCAAAGGTGTTCACTGG
1M101.164R	CCGATGACTACTATCAGCAACC
3M2.58F/L1F	CTTTCAGATCGGGTCGAGAATC
3M2.58R/L1R	CATTTGTCGCCTGCCATTGCTC
3M8.69F /L2F	ATCTATCGGTCATCTTTGGGAA
3M8.69R/L2R	TTAGTGCCATCGTCAAGTCCTG
3M9.42F/L3F	CTTCAGTGCTTCAGTTTTCAGA
3M9.42R/L3R	CTAAGTGCAGCTCAATCCATAC
3M13.385F	GTGATTGGTGAGAACCTGGAAC
3M13.385R	CCAGCCTCGTTTGGGAGAAGCG
3M14.081F	ATTTGGTGGTGGAAGTAGTA
3M14.081R	TAGGCTTCTTATGTAAACTC
3M14.244F	CCTCCTTCCTTCCCATTC
3M14.244R	TTGCGAAGGACACCAGAG
3M14.893F	GTTGGTGTCGCTCGTGAAGG
3M14.893R	GAGGGAACCTCATAAACGAC
3M15.506F	TTTAATTCACCGCATTGGTA
3M15.506R	CCTGAAATGGCATTAGCAGA
3M15.609F	TTTGTTGGTGAAACGGAATC
3M15.609R	GAAACTAACTGAGCCGAACT
3M15.906F	CCTTCAAAGGGAAGAAAACT
3M15.906R	ATGGGTTCAAAGAAAGGAGA
3M16.373F	ACAATGGGAGCCATGTGAGT
3M16.373R	ATTGTAGGGTGGAAGATTGA
3M16.516F	AGCTTGCCAAATAAACATTC
3M16.516R	ATTGAGGCTAGGATCAGGGA
3M16.869F	TCTGAGGACTGAAAACACGACT
3M16.869R	GTGTGGTTGGCTTCAGGAGTCA
3M19.206F/L4F	AGACAAGATTGAAGGGGAAACG
3M19.206R/L4R	TTGTGCCGCTCCACCTTCTCCT
3M25.476F/L5F	ATACGGGTGACAATTACCAACT
3M25.476R/L5R	CAATTTAGTCCCTCGATTTTGC
3M31.898F/L6F	ATTTGGGTAGTTGTTGATAGGT
3M31.898R/L6R	TTCTAACATCTGTATCGTCCAC
8M49.167F	AGTAGTGGGTTGCTTACTGAAT
8M49.167R	TCACAGTTTATCTAGGCTTGGT
8M55.387F	GCTACTCTGATGTGTTTTGGGC
8M55.387R	TTACAAAAATGCCACTGAGAGC
8M58.408F	AGCACAGCGAAATGATGGAAAT
8M58.408R	CAAAGCCCTTGCGCTTGTTCTT
8M63.403F	ATTGACCCCAATAATCTCCTCA
8M63.403R	GGCACCCAACCTTCATTCATTT
For Fob1 qRT-PCR
actin F	gAgTATgATgAgTCgggTCCAg
actin R	ACACCAACAATCCCAAACAgAg
03G006380-qF1	TTACTGCTGCTAACTCCTTC
03G006380-qR1	ATACATCTTGATTTCTCTCG
03G006410-qF1	CAAAGAGTTGGTGGATGAGT
03G006410-qR1	GAACAGCAGAGTAAAGAGCC
03G006470-qF1	GTAAACGCCTTGATACCCAC
03G006470-qR1	TCACTTCCTTCCGAAATAGC
03G006550-qF1	TCCAGTTATCCTCAGCAATCCCAT
03G006550-qR1	TTCATCGGCTGCGAATCTGG
For cDNA fragment cloning
03G006380-cds-F	ATGAAAAATATGAAGGCCTATTCACT
03G006380-cds-R	TTAAAAAGACCTTTGATTGTAGCA
03G006410-cds-F	ATGGCTACCAAGTACCATGCAA
03G006410-cds-R	TTATTGAGAGATTATGTTCAAC
03G006470-cds-F	ATGGAAGACAGTCGTGTACGGTGG
03G006470-cds-R	TCAGCAGGCACAGGCAGAGATGT
03G006550-cds-F	ATGGCGGAAAGCTTAGAAGAGGTA
03G006550-cds-R	TTATGTGGTCACAACATCAGGAATT
